# Supplementary material for: Explanations for the development of a novel universally inside pipe separator for dismantling (contaminated) pipelines
Source: Copernicus journal article supplement (doi:10.5194/sand-1-19-2021), 2021-11-10
Supplement: Supplementary file 1 [file sand-1-19-2021-supplement.pdf]

Supplement of Saf. Nucl. Waste Disposal, 1, 19–20, 2021  
<https://doi.org/10.5194/sand-1-19-2021-supplement>  
© Author(s) 2021. CC BY 4.0 License.

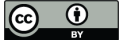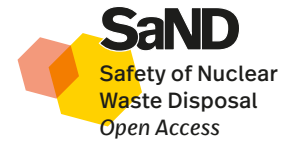

*Supplement of*

## **Explanations for the development of a novel universally inside pipe separator for dismantling (contaminated) pipelines**

**Madeleine Bachmann and Sascha Gentes**

*Correspondence to:* Madeleine Bachmann ([madeleine.bachmann@kit.edu](mailto:madeleine.bachmann@kit.edu))

The copyright of individual parts of the supplement might differ from the article licence.

# Explanations for the development of a novel universally inside pipe separator for dismantling (contaminated) pipelines

Funded by the Federal Ministry of Education and Research (BMBF) as part of the FORKA - Research for the Decommissioning of Nuclear Facilities funding measure.

## 1. State of the Art

- Dismantling of pipelines in nuclear facilities poses a variety of challenges due to, among other factors confined space or the routing of pipelines
- Existing pipe cutting systems have significant disadvantages:
  - Not suitable for mobile use
  - Cutting the pipes is usually done from the outside of the pipe
  - Cutting systems for internal pipe separation are only available for a specific application or pipe diameter
  - No integrated drive and holding system as well as high set-up and assembly times

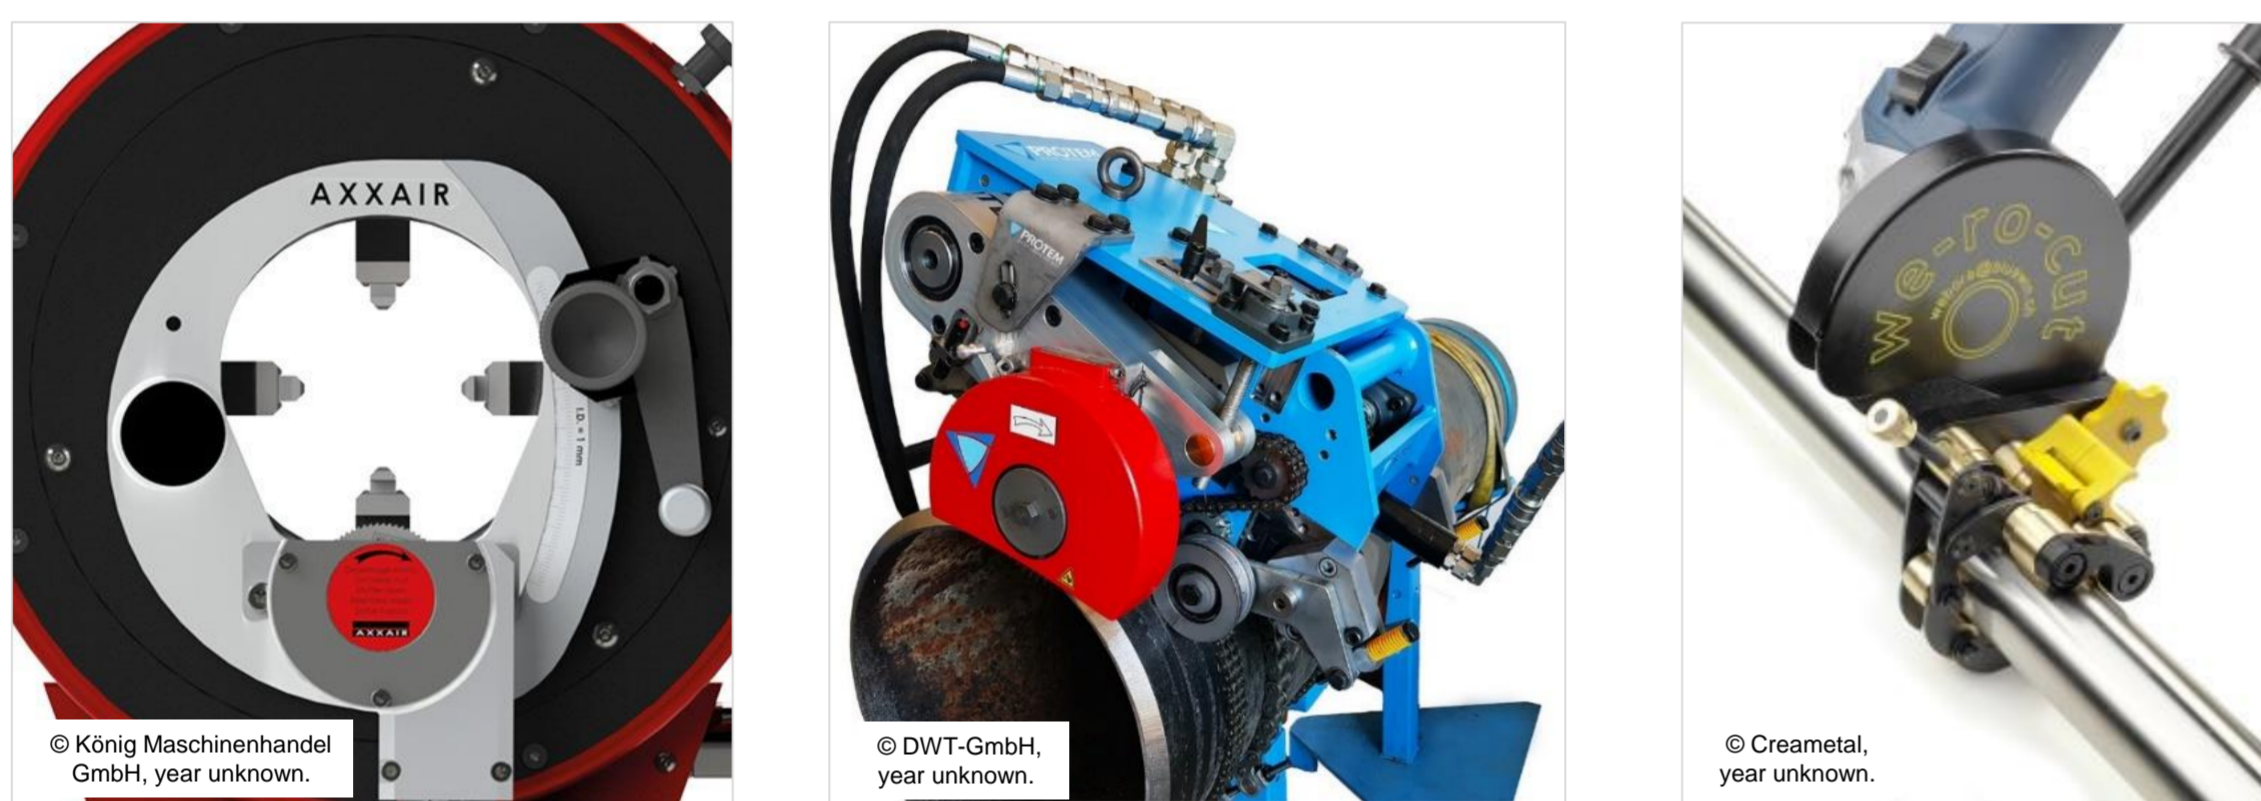

Small excerpt of examples of currently available cutting systems for the dismantling of pipelines

## 2. Aim of the Project

- Development of an innovative internal pipe cutting device with a wide range of applications in terms of pipe diameter, wall thickness and material
- Continuous extraction of chips or other residual materials
- Combination of cutting and cleaning as well as removal of the cut pipelines
- Dismantling of pipelines that are difficult to access, use both in air and under water
- Manual or remote operation for flexible insertion
- Decontamination of the internal pipe separator

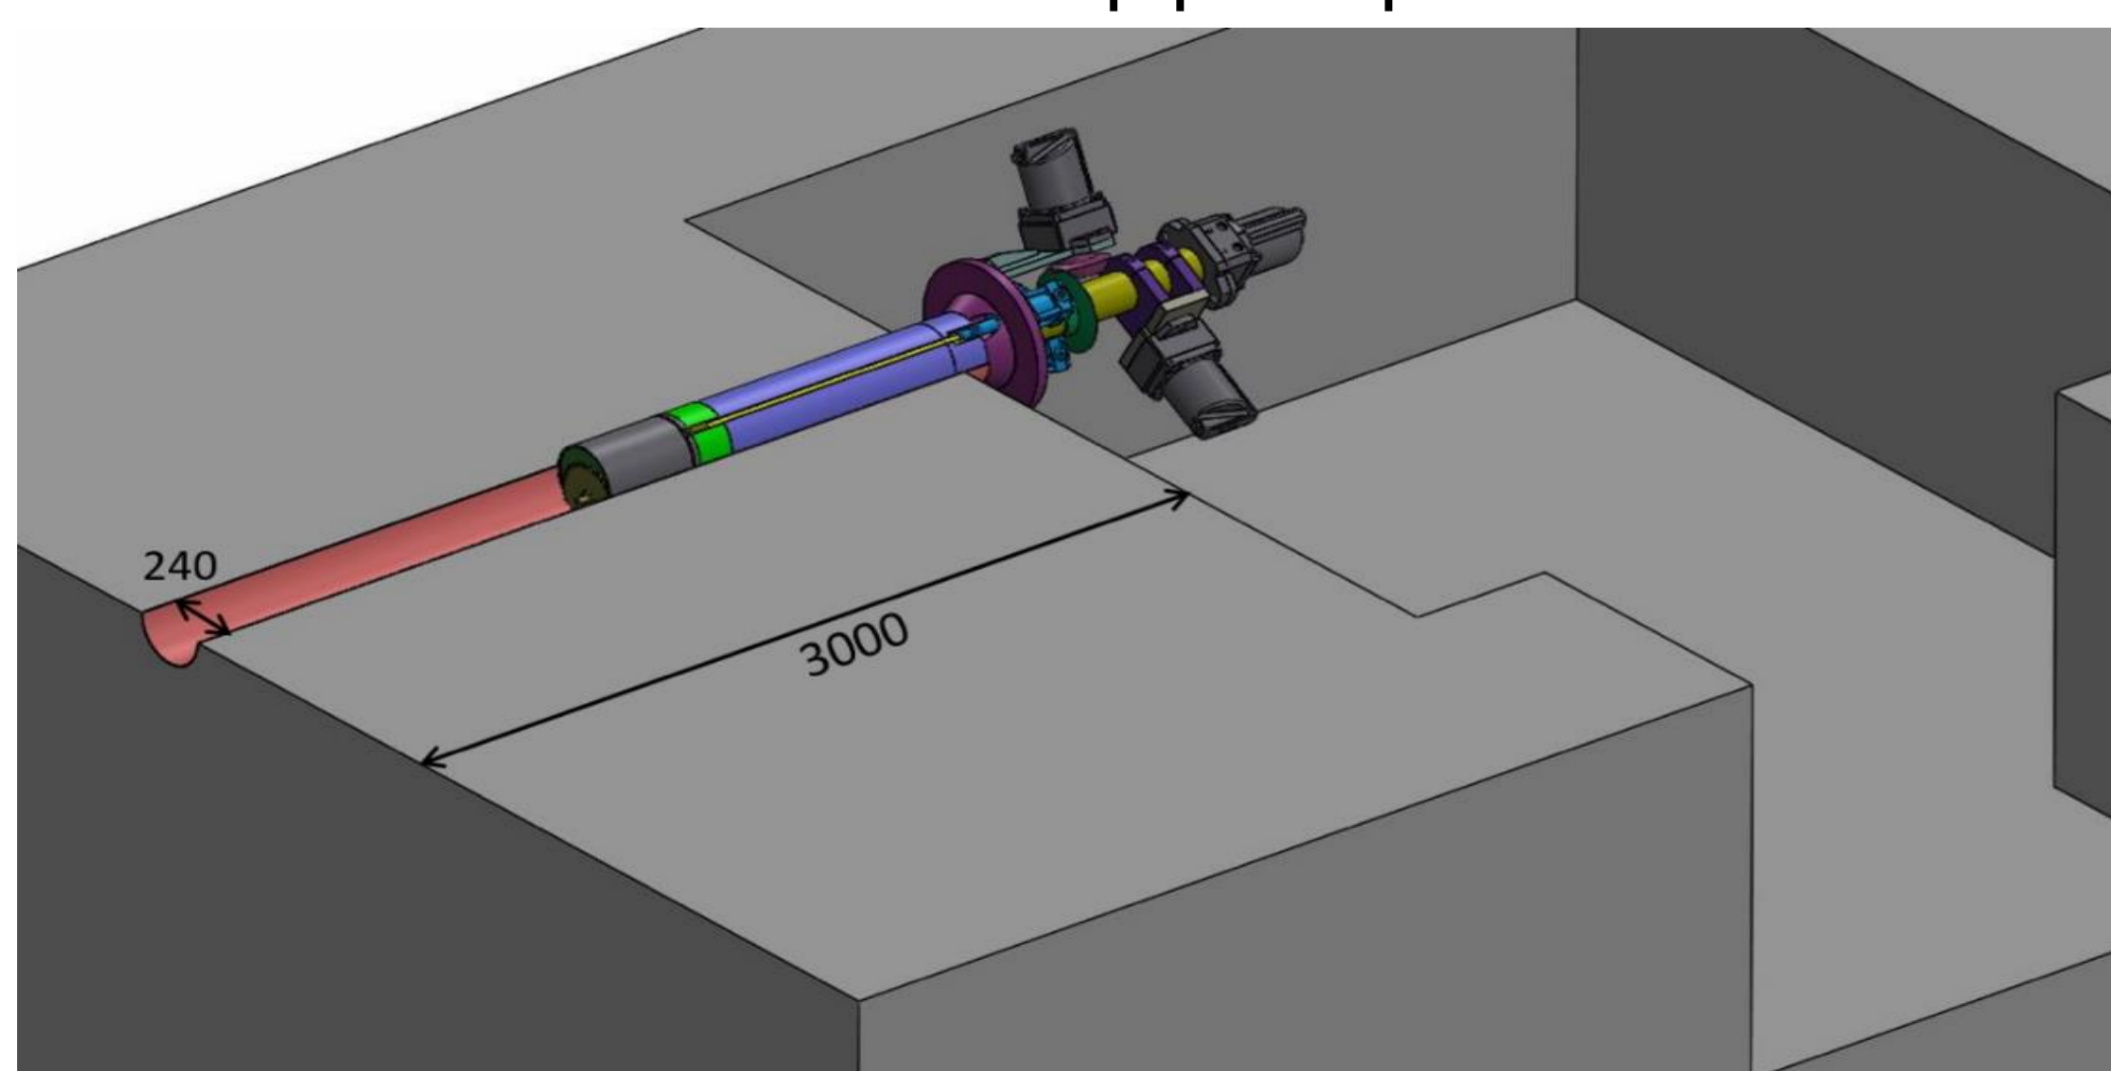

Schematic illustration of the planned cutting device [dimensions in mm].  
© Siempelkamp NIS

## 3. Research at KIT – TMB

- Development and construction of a test stand

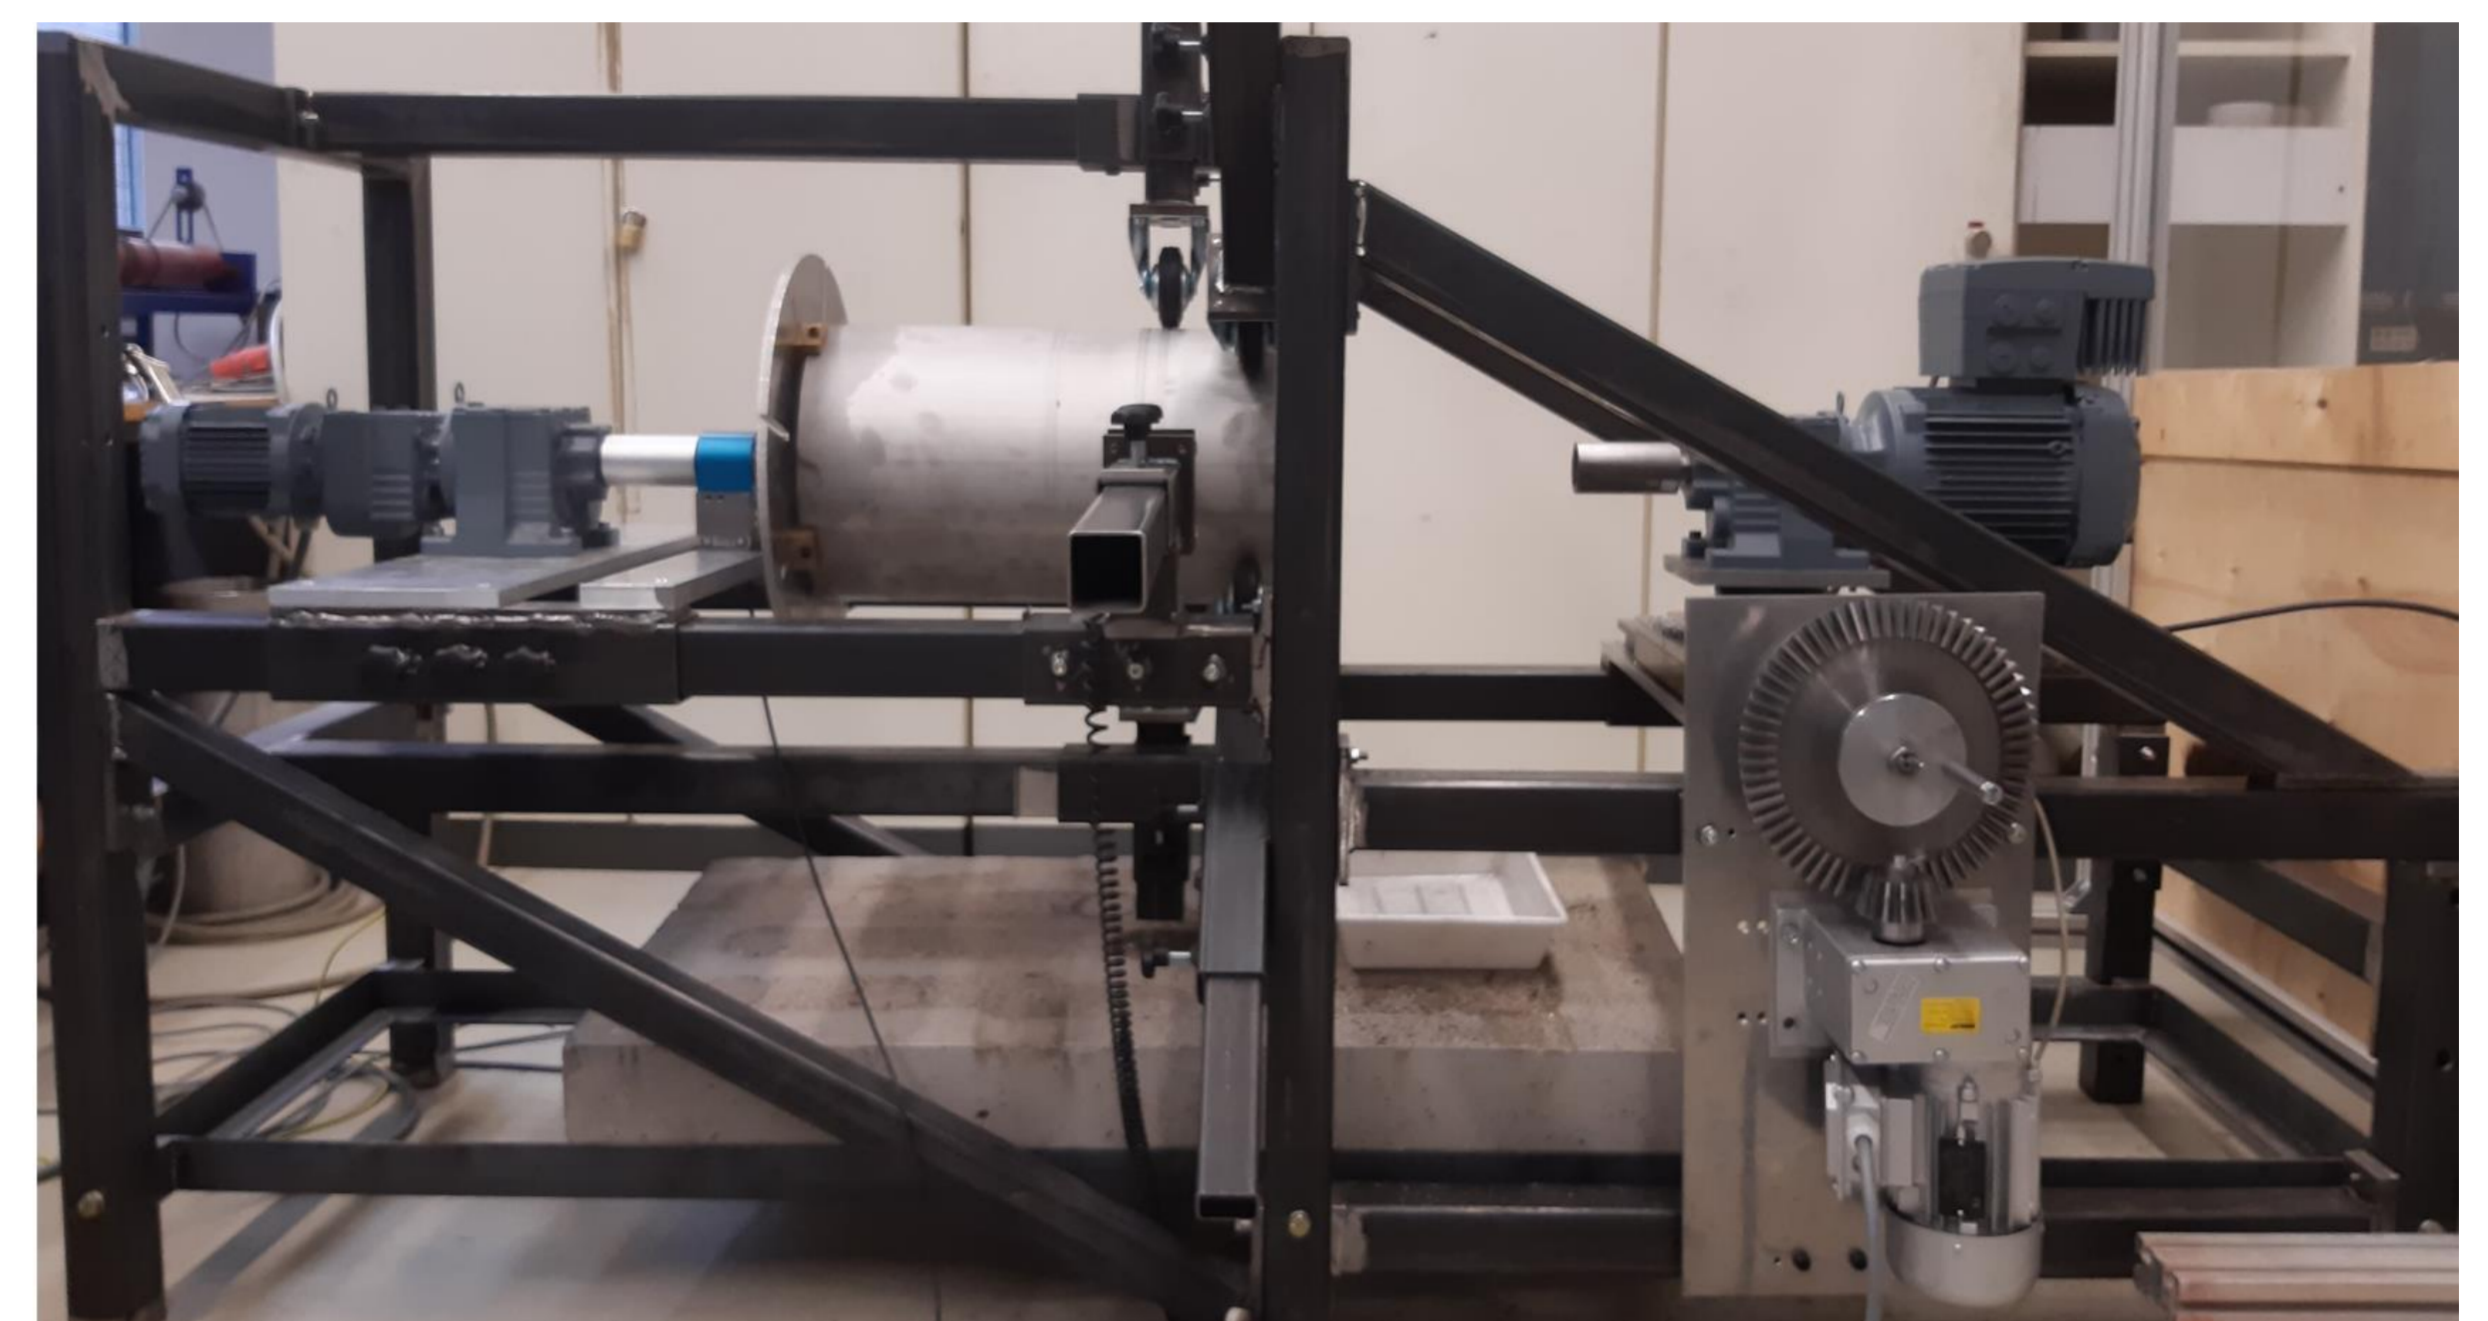

Measuring stand for pre-test series at KIT

- Experimental test series for uniform internal pipe cutting with different cutting tools

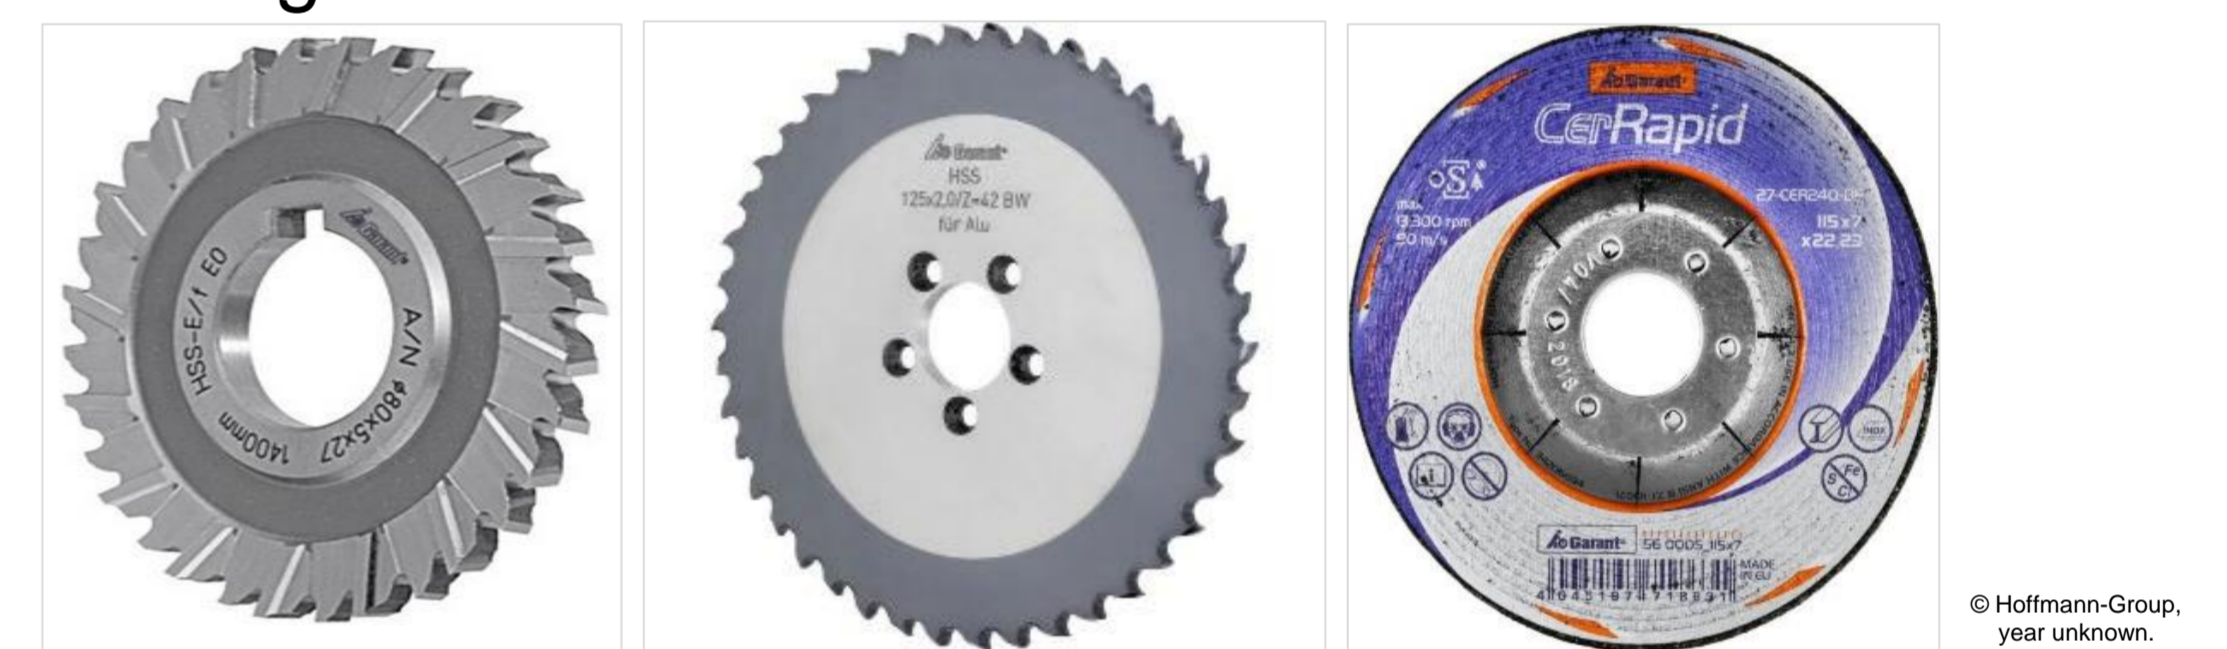

Milling discs, saw blades and cutting discs are used for the pre-test series

- Test series on different pipes
  - Wall thickness, material and diameter

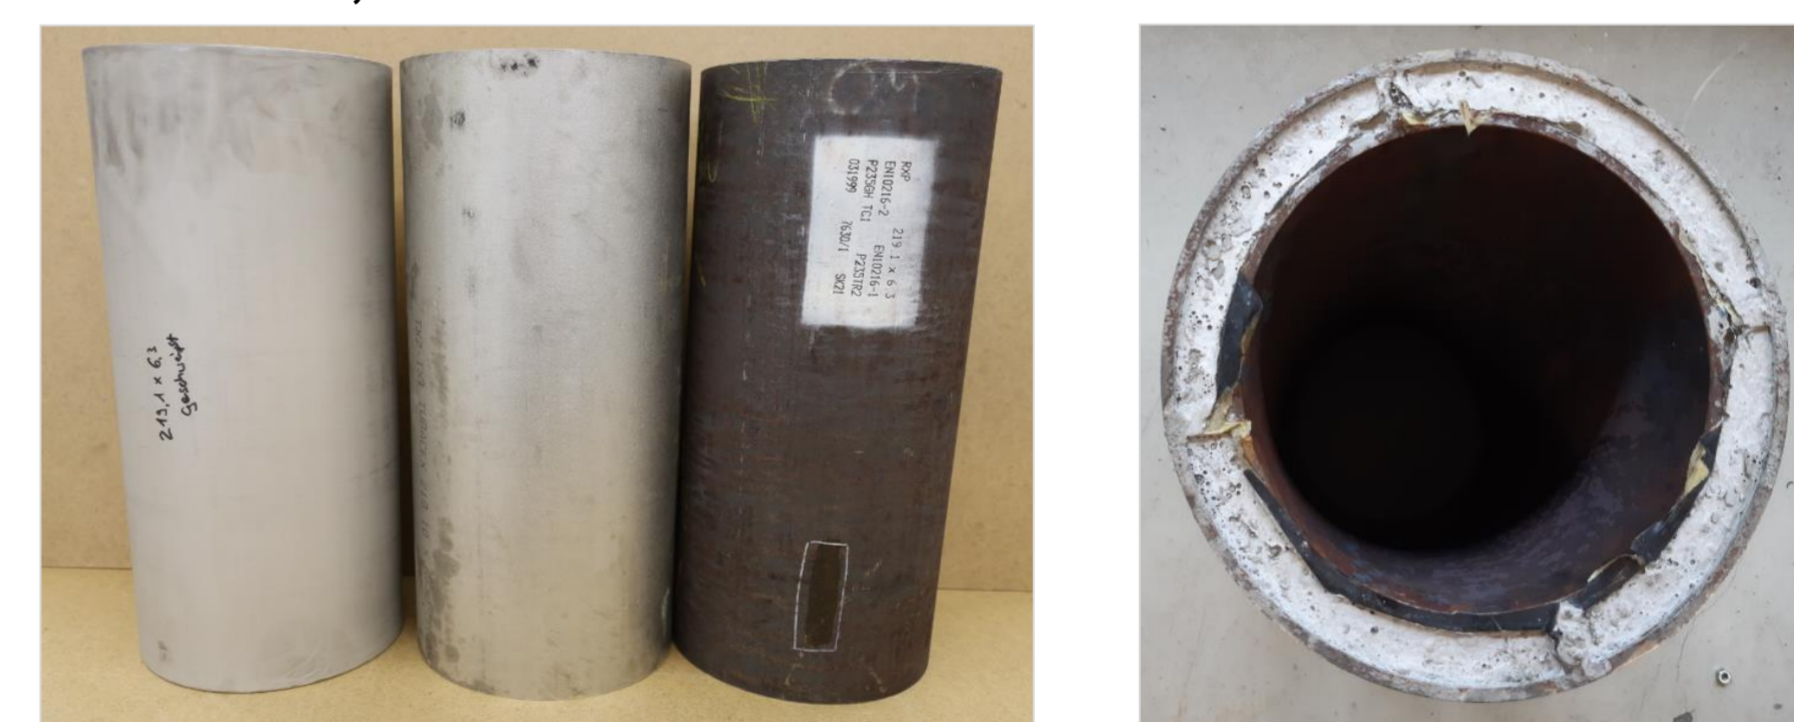

Pre-Test are performed on exposed and concreted- in pipes

- Practical test series of different operating parameters
  - Feed rate and Speed

## Project Information

Funding code BMBF: 15S9415A

Funding period: 01.08.2019 – 31.07.2022

Project partner:

Siempelkamp NIS engineering company mbH

RWE Nuclear GmbH

  
Siempelkamp  
NIS Ingenieurgesellschaft mbH



Karlsruhe Institute of Technology (KIT)

Institute of Technology and Management in Construction (TMB)

Prof. Dr.-Ing. Sascha Gentes, Tel.: +49 721 608-46546, E-Mail: sascha.gentes@kit.edu

M.Sc. Madeleine Bachmann, Tel.: +49 721 608-48221, E-Mail: madeleine.bachmann@kit.edu

M.Sc. Michael Pfau, Tel.: +49 721 608-48221, E-Mail: michael.pfau@kit.edu

SPONSORED BY THE

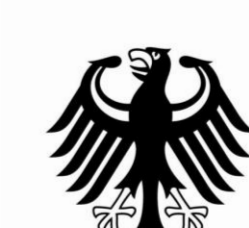

Federal Ministry  
of Education  
and Research
